# Supplementary material for: Heterogeneous Expression and Subcellular Localization of Pyruvate Dehydrogenase Complex in Prostate Cancer
Source: PubMed Central journal article supplement (PMC9174590; doi:10.3389/fonc.2022.873516), 2022-05-25

## Supplementary Figure legend

**Supplementary Figure 1.** mRNA expression of PDH genes in prostate tissues and prostate cancer. RNA-seq data from normal tissues are from the database GTEx (Genotype-Tissue Expression), and data are expressed as RPKM (reads per kilobase per million mapped reads). RNA-seq data from tumors are from database TCGA (The Cancer Genome Atlas), and data are expressed as FPKM (fragments per kilobase of exon per million reads). All data are from <https://www.proteinatlas.org/>.

Supplementary Figure 1

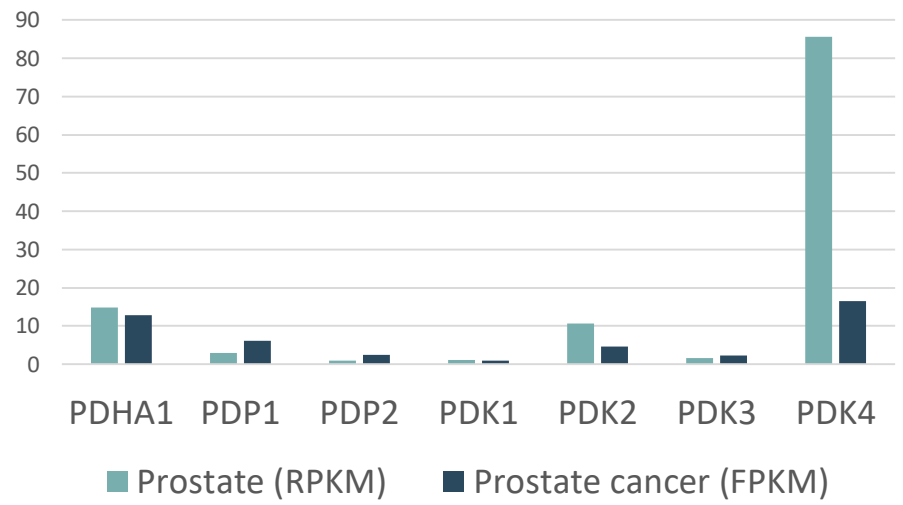

Supplement: DataSheet_1.pdf [file DataSheet_1.pdf]
